# Supplementary material for: Human antibodies targeting a Mycobacterium transporter protein mediate protection against tuberculosis
Source: PubMed Central journal article supplement (PMC7840946; doi:10.1038/s41467-021-20930-0), 2021-01-27
Supplement: 41467_2021_20930_MOESM2_ESM.pdf [file 41467_2021_20930_MOESM2_ESM.pdf]

## Reporting Summary

Nature Research wishes to improve the reproducibility of the work that we publish. This form provides structure for consistency and transparency in reporting. For further information on Nature Research policies, see our [Editorial Policies](#) and the [Editorial Policy Checklist](#).

### Statistics

For all statistical analyses, confirm that the following items are present in the figure legend, table legend, main text, or Methods section.

n/a Confirmed

- The exact sample size ( $n$ ) for each experimental group/condition, given as a discrete number and unit of measurement
- A statement on whether measurements were taken from distinct samples or whether the same sample was measured repeatedly
- The statistical test(s) used AND whether they are one- or two-sided  
*Only common tests should be described solely by name; describe more complex techniques in the Methods section.*
- A description of all covariates tested
- A description of any assumptions or corrections, such as tests of normality and adjustment for multiple comparisons
- A full description of the statistical parameters including central tendency (e.g. means) or other basic estimates (e.g. regression coefficient) AND variation (e.g. standard deviation) or associated estimates of uncertainty (e.g. confidence intervals)
- For null hypothesis testing, the test statistic (e.g.  $F$ ,  $t$ ,  $r$ ) with confidence intervals, effect sizes, degrees of freedom and  $P$  value noted  
*Give  $P$  values as exact values whenever suitable.*
- For Bayesian analysis, information on the choice of priors and Markov chain Monte Carlo settings
- For hierarchical and complex designs, identification of the appropriate level for tests and full reporting of outcomes
- Estimates of effect sizes (e.g. Cohen's  $d$ , Pearson's  $r$ ), indicating how they were calculated

*Our web collection on [statistics for biologists](#) contains articles on many of the points above.*

### Software and code

Policy information about [availability of computer code](#)

Data collection

Data analysis

For manuscripts utilizing custom algorithms or software that are central to the research but not yet described in published literature, software must be made available to editors and reviewers. We strongly encourage code deposition in a community repository (e.g. GitHub). See the Nature Research [guidelines for submitting code & software](#) for further information.

### Data

Policy information about [availability of data](#)

All manuscripts must include a [data availability statement](#). This statement should provide the following information, where applicable:

- Accession codes, unique identifiers, or web links for publicly available datasets
- A list of figures that have associated raw data
- A description of any restrictions on data availability

All data is available in the main text, in the Supplementary Data, Materials or in the Source Data files. Antibody sequence data has been deposited in the NCBI database under Submission 2406654. Crystal structures presented in this work has been deposited in the RCSB Protein Data Bank (PDB) and are available with accession codes 7DM1 (complex of PstS1 and Fab p4-36) and 7DM2 (complex of PstS1 and Fab p4-170). The authors declare that all unique materials used are readily available from the authors upon MTA agreement. Source data are provided with this paper.

## Field-specific reporting

Please select the one below that is the best fit for your research. If you are not sure, read the appropriate sections before making your selection.

- Life sciences       Behavioural & social sciences       Ecological, evolutionary & environmental sciences

For a reference copy of the document with all sections, see [nature.com/documents/nr-reporting-summary-flat.pdf](https://www.nature.com/documents/nr-reporting-summary-flat.pdf)

## Life sciences study design

All studies must disclose on these points even when the disclosure is negative.

|                 |                                                                                                                                                                                                                                                                                                                                                                                     |
|-----------------|-------------------------------------------------------------------------------------------------------------------------------------------------------------------------------------------------------------------------------------------------------------------------------------------------------------------------------------------------------------------------------------|
| Sample size     | For human studies: 26 patients with active Tuberculosis, gender was added. Based on previous literature we expected about 0.5-1% responders to each antigen, therefore we wished to recruit between 20-30 infected subjects. For mouse studies: each experiment included Balb/c 6 mice based on previous work. The experiments we conducted three times unless indicated otherwise. |
| Data exclusions | No data was excluded                                                                                                                                                                                                                                                                                                                                                                |
| Replication     | All mouse experiment were conducted three times unless indicated otherwise. All the mice experiments were successful. All The ELISA experiments testing the human sera for binding to MTb lysates or antigens were conducted at least three times for every patient with every lysate/antigen. For H37rv lysate and CDC1551 ELISA's were done twice.                                |
| Randomization   | all samples were randolmy labeled, and only after the data was available the samples were de-coded                                                                                                                                                                                                                                                                                  |
| Blinding        | The antibodies were isolated by the laboratory in Tel Aviv and sent to Beijing without identification. The investigators in Beijing tested the antibodies for neutralization blindly and reported the results.                                                                                                                                                                      |

## Reporting for specific materials, systems and methods

We require information from authors about some types of materials, experimental systems and methods used in many studies. Here, indicate whether each material, system or method listed is relevant to your study. If you are not sure if a list item applies to your research, read the appropriate section before selecting a response.

### Materials & experimental systems

| n/a                                 | Involvement in the study                                        |
|-------------------------------------|-----------------------------------------------------------------|
| <input type="checkbox"/>            | <input checked="" type="checkbox"/> Antibodies                  |
| <input type="checkbox"/>            | <input checked="" type="checkbox"/> Eukaryotic cell lines       |
| <input checked="" type="checkbox"/> | <input type="checkbox"/> Palaeontology and archaeology          |
| <input type="checkbox"/>            | <input checked="" type="checkbox"/> Animals and other organisms |
| <input type="checkbox"/>            | <input checked="" type="checkbox"/> Human research participants |
| <input checked="" type="checkbox"/> | <input type="checkbox"/> Clinical data                          |
| <input checked="" type="checkbox"/> | <input type="checkbox"/> Dual use research of concern           |

### Methods

| n/a                                 | Involvement in the study                           |
|-------------------------------------|----------------------------------------------------|
| <input checked="" type="checkbox"/> | <input type="checkbox"/> ChIP-seq                  |
| <input type="checkbox"/>            | <input checked="" type="checkbox"/> Flow cytometry |
| <input checked="" type="checkbox"/> | <input type="checkbox"/> MRI-based neuroimaging    |

## Antibodies

|                 |                                                                                                                                                                                                                                                                                                                                          |
|-----------------|------------------------------------------------------------------------------------------------------------------------------------------------------------------------------------------------------------------------------------------------------------------------------------------------------------------------------------------|
| Antibodies used | anti human igg-hrp, jackson, catalog: 109-035-088, lot: 132329; anti-human igg vio-blue, miltenyi, catalog: 130-119-881, clone: is11-3b2.2.3, lot: 5191212216; cd19anti-human vioblue, miltenyi, catalog: 130-113-172, clone:lt19, lot: 5200700754; anti-igg apc, miltenyi, catalog: 130-119-772, clone: is11-3b2.2.3, lot: 5200400050   |
| Validation      | All antibodies used for FACS were used separately to stain cells and validate their specificity and activity. In ELISA we tested the binding of the secondary antibody to MTb lysates as well as antigens. human IgG was coated on the plate as a positive control. Cross reactivity to other IgGs was tested and found to be negligible |

## Eukaryotic cell lines

Policy information about [cell lines](#)

|                          |                                                    |
|--------------------------|----------------------------------------------------|
| Cell line source(s)      | THP-1 macrophages                                  |
| Authentication           | cells are from ATCC material resource              |
| Mycoplasma contamination | all cell lines were tested negative for mycoplasma |

Commonly misidentified lines  
(See [ICLAC](#) register)

none

## Animals and other organisms

Policy information about [studies involving animals](#); [ARRIVE guidelines](#) recommended for reporting animal research

|                         |                                                                                                                                                          |
|-------------------------|----------------------------------------------------------------------------------------------------------------------------------------------------------|
| Laboratory animals      | Specific pathogen-free female BALB/c mice (Strain No.211) were purchased from Beijing Vital River Laboratory Animal Technology Co. Ltd (Beijing, China). |
| Wild animals            | no                                                                                                                                                       |
| Field-collected samples | no                                                                                                                                                       |
| Ethics oversight        | Chinese Association for Laboratory Animal Sciences, and approved by the institutional ethical Committee (IEC) of Peking Union Medical College            |

Note that full information on the approval of the study protocol must also be provided in the manuscript.

## Human research participants

Policy information about [studies involving human research participants](#)

|                            |                                                                                                                                                                                                                                                                                                                                                                                                                                                       |
|----------------------------|-------------------------------------------------------------------------------------------------------------------------------------------------------------------------------------------------------------------------------------------------------------------------------------------------------------------------------------------------------------------------------------------------------------------------------------------------------|
| Population characteristics | 26 in-patients with Active tuberculosis disease between the ages 18-65. All patients received standard treatment, recovered, and were eventually discharged. 18 males and 8 females                                                                                                                                                                                                                                                                   |
| Recruitment                | All participants were recruited in Shmuel Harofe hospital and signed a consent form, exclusion criteria were children, and insufficient blood hemoglobin levels.                                                                                                                                                                                                                                                                                      |
| Ethics oversight           | Tel Aviv University Institutional Review Board (IRB) approved all studies involving patient enrollment, sample collection, and clinical follow-up. Donors provided written informed consent prior to participating in this study, and The Tel Aviv University and Shmuel Harofe Hospital Institutional Review Boards approved all studies involving patient enrollment, sample collection, and clinical follow-up (protocols number 33.18. and 0058). |

Note that full information on the approval of the study protocol must also be provided in the manuscript.

## Flow Cytometry

### Plots

Confirm that:

- The axis labels state the marker and fluorochrome used (e.g. CD4-FITC).
- The axis scales are clearly visible. Include numbers along axes only for bottom left plot of group (a 'group' is an analysis of identical markers).
- All plots are contour plots with outliers or pseudocolor plots.
- A numerical value for number of cells or percentage (with statistics) is provided.

### Methodology

|                           |                                                                                                                                                                                                                                       |
|---------------------------|---------------------------------------------------------------------------------------------------------------------------------------------------------------------------------------------------------------------------------------|
| Sample preparation        | Frozen PBMCs were thawed and immediately stained                                                                                                                                                                                      |
| Instrument                | FACS ARIA III                                                                                                                                                                                                                         |
| Software                  | Analysis by Flowjo                                                                                                                                                                                                                    |
| Cell population abundance | After thawing the PBMCs from the donor, B cell enrichment with CD20 magnetic beads was carried out, followed with over 80% B cells, 3.6% of which were IgG expressing cells. Within this population 0.5% were positive to PstS1 bait. |
| Gating strategy           | We gated on live cells, singlets, followed by gating on CD19+IgG+ population (comprising 3.6% of the live singlets cells). Next, we gated on PstS1 positive cells that were single-cell sorted.                                       |

Tick this box to confirm that a figure exemplifying the gating strategy is provided in the Supplementary Information.
